# Supplementary material for: Validation of a Brief Screening Instrument for Chemical Intolerance in a Large U.S. National Sample
Source: MDPI journal article supplement (doi:10.3390/ijerph18168714), 2021-08-18
Supplement: s1 [file s1]

## **\*Quick Environmental Exposure and Sensitivity Inventory (QEESI)**

### **Publications by Country**

#### **Austria**

Weiss, E. M., Singewald, E., Baldus, C., Hofer, E., Marksteiner, J., Nasrouei, S., . . . Holzer, P. (2017). Differences in psychological and somatic symptom cluster score profiles between subjects with Idiopathic environmental intolerance, major depression and schizophrenia. *Psychiatry Research*, 249, 187-194. doi:10.1016/j.psychres.2016.12.057

#### **China**

Huang, L.-L., Ikeda, K., Chiang, C.-M., Kagi, N., Hojo, S., & Yanagi, u. (2011). Field Survey on the Relation between IAQ and Occupants' Health in 40 Houses in Southern Taiwan. *Journal of Asian Architecture and Building Engineering*, 10. doi:10.3130/jaabe.10.249

Huang, L.-l., Ikeda, K., Hojo, S., Kagi, N., & Juan, H.-C. (2014). Study of the different Cutoff Point of the QEESI Questionnaire as a Screening Tool for Sick Building Syndrome Diagnosis in Taiwan. *Journal of Asian Architecture and Building Engineering*, 13(2), 507-513. doi:10.3130/jaabe.13.507

#### **Columbia**

Storino, V., Muñoz-Ortiz, J., Villabona-Martinez, V., Villamizar-Sanjuán, J. D., Rojas-Carabali, W., & de-la-Torre, A. (2021). An Unusual Case of Multiple Food Allergies Comorbid with Multiple Chemical Sensitivity: A Case Report. *Journal of asthma and allergy*, 14, 317–323. <https://doi.org/10.2147/JAA.S293248>

#### **Denmark**

Dantoft, T. M., Elberling, J., Brix, S., Szecsi, P. B., Vesterhauge, S., & Skovbjerg, S. (2014). An elevated pro-inflammatory cytokine profile in multiple chemical sensitivity. *Psychoneuroendocrinology*, 40, 140-150. doi:10.1016/j.psyneuen.2013.11.012

Hauge, C. R., Rasmussen, A., Piet, J., Bonde, J. P., Jensen, C., Sumbundu, A., & Skovbjerg, S. (2015). Mindfulness-based cognitive therapy (MBCT) for multiple chemical sensitivity (MCS): Results from a randomized controlled trial with 1 year follow-up. *Journal of Psychosomatic Research*, 79(6), 628-634. doi:10.1016/j.jpsychores.2015.06.010

Skovbjerg, S., Berg, N. D., Elberling, J., & Christensen, K. B. (2012). Evaluation of the Quick Environmental Exposure and Sensitivity Inventory in a Danish Population. *Journal of Environmental and Public Health*, 2012, 304314. doi:10.1155/2012/304314

Tran, M. T. D., Skovbjerg, S., Arendt-Nielsen, L., Bech, P., Lunde, M., & Elberling, J. (2014). Two of three patients with multiple chemical sensitivity had less symptoms and secondary hyperalgesia after transcranially applied pulsed electromagnetic fields. *Scand J Pain*, 5(2), 104-109. doi:10.1016/j.sjpain.2013.11.008

Tran, M. T. D., Skovbjerg, S., Arendt-Nielsen, L., Christensen, K. B., & Elberling, J. (2017). A randomised, placebo-controlled trial of transcranial pulsed electromagnetic fields in patients with multiple chemical sensitivity. *Acta Neuropsychiatrica. Officieel Wetenschappelijk Orgaan van Het IGBP (Interdisciplinair Genootschap voor Biologische Psychiatrie)*, 29(5), 267-277. doi:10.1017/neu.2016.51

## **Finland**

- Heinonen-Guzejev, M., Koskenvuo, M., Mussalo-Rauhamaa, H., Vuorinen, H., Heikkilä, K., & Kaprio, J. (2012). Noise sensitivity and multiple chemical sensitivity scales: Properties in a population based epidemiological study. *Noise and Health*, 14(60), 215-223. doi:10.4103/1463-1741.102956
- Selinheimo, S., Vuokko, A., Hublin, C., Järnefelt, H., Karvala, K., Sainio, M., . . . Paunio, T. (2019). Health-related quality among life of employees with persistent nonspecific indoor-air-associated health complaints. *Journal of Psychosomatic Research*, 122, 112-120. doi:10.1016/j.jpsychores.2019.03.181
- Vuokko, A., Karvala, K., Suojalehto, H., Lindholm, H., Selinheimo, S., Heinonen-Guzejev, M., . . . Sainio, M. (2019). Clinical Characteristics of Disability in Patients with Indoor Air-Related Environmental Intolerance. *Safety and health at work*, 10(3), 362-369. doi:10.1016/j.shaw.2019.06.003

## **France**

- Kamoun, H., Romdhane, N. A., Rekik, W., Laadheri, N., Youssef, I., Ben Salah, F., & Gharbi, R. (2011). Multiple chemical sensitivity syndrome. Observation of a cohort of 20 workers. *Archives des Maladies Professionnelles et de l'Environnement*, 72(1), 73-79. <https://doi.org/10.1016/j.admp.2010.08.006>

## **Germany**

- Bauer, A., Schwarz, E., Martens, U. (2007). Patients with multiple chemical sensitivities: A case for environmental or psychosomatic medicine? *Zeitschrift fur Allgemeinmedizin*, 83(11):442-446.
- Schnakenberg, E., Fabig, K. R., Stanulla, M., Strobl, N., Lustig, M., Fabig, N., & Schloot, W. (2007). A cross-sectional study of self-reported chemical-related sensitivity is associated with gene variants of drug-metabolizing enzymes. *Environmental health : a global access science source*, 6, 6. <https://doi.org/10.1186/1476-069X-6-6>

## **Indonesia**

- Hildebrandt, S., Kubota, T., Sani, H. A., & Surahman, U. (2019). *Indoor Air Quality and Health in Newly Constructed Apartments in Developing Countries: A Case Study of Surabaya, Indonesia*. *Atmosphere*, 10(4):182
- Kubota, T., Sani, H. A., Hildebrandt, S., & Surahman, U. (2020). Indoor air quality and self-reported multiple chemical sensitivity in newly constructed apartments in Indonesia. *Architectural Science Review*. <https://doi.org/10.1080/00038628.2020.1779647>

## **Italy**

- Caccamo, D., Cesareo, E., Mariani, S., Raskovic, D., Ientile, R., Currò, M., . . . De Luca, C. (2013). Xenobiotic sensor- and metabolism-related gene variants in environmental sensitivity-related illnesses: a survey on the Italian population. *Oxidative Medicine and Cellular Longevity*, 2013, 831969. doi:10.1155/2013/831969
- De Luca, C., Scordo, M. G., Cesareo, E., Pastore, S., Mariani, S., Maiani, G., . . . Korkina, L. G. (2010). Biological definition of multiple chemical sensitivity from redox state and cytokine profiling and not from polymorphisms of xenobiotic-metabolizing enzymes. *Toxicology and Applied Pharmacology*, 248(3), 285-292. doi:10.1016/j.taap.2010.04.017

- De Luca, C., Thai, J. C., Raskovic, D., Cesareo, E., Caccamo, D., Trukhanov, A., & Korkina, L. (2014). Metabolic and genetic screening of electromagnetic hypersensitive subjects as a feasible tool for diagnostics and intervention. *Mediators of Inflammation*, 2014, 924184. doi:10.1155/2014/924184
- De Luca, C., Gugliandolo, A., Calabrò, C., Currò, M., Ientile, R., Raskovic, D., . . . Caccamo, D. (2015). Role of Polymorphisms of Inducible Nitric Oxide Synthase and Endothelial Nitric Oxide Synthase in Idiopathic Environmental Intolerances. *Mediators of Inflammation*, 2015, 245308. doi:10.1155/2015/245308
- Gugliandolo, A., Gangemi, C., Calabrò, C., Vecchio, M., Di Mauro, D., Renis, M., . . . Caccamo, D. (2016). Assessment of glutathione peroxidase-1 polymorphisms, oxidative stress and DNA damage in sensitivity-related illnesses. *Life Sciences*, 145, 27-33. doi:10.1016/j.lfs.2015.12.028
- Micarelli, A., Viziano, A., Bruno, E., Micarelli, E., & Alessandrini, M. (2016). Vestibular impairment in Multiple Chemical Sensitivity: Component analysis findings. *Journal of Vestibular Research*, 26(5-6), 459-468. doi:10.3233/ves-160594
- Micarelli, A., Viziano, A., Genovesi, G., Bruno, E., Ottaviani, F., & Alessandrini, M. (2016). Lack of contralateral suppression in transient-evoked otoacoustic emissions in multiple chemical sensitivity: a clinical correlation study. *Noise Health*, 18(82), 143-149. doi:10.4103/1463-1741.181997
- Viziano, A., Micarelli, A., & Alessandrini, M. (2017). Noise sensitivity and hyperacusis in patients affected by multiple chemical sensitivity. *International Archives of Occupational and Environmental Health*, 90(2), 189-196. doi:10.1007/s00420-016-1185-8

## Japan

- Azuma, K., Uchiyama, I., Takano, H., Tanigawa, M., Azuma, M., Bamba, I., & Yoshikawa, T. (2013). Changes in cerebral blood flow during olfactory stimulation in patients with multiple chemical sensitivity: a multi-channel near-infrared spectroscopic study. *PloS One*, 8(11), e80567. doi:10.1371/journal.pone.0080567
- Azuma, K., Uchiyama, I., Katoh, T., Ogata, H., Arashidani, K., & Kunugita, N. (2015a). Prevalence and Characteristics of Chemical Intolerance: A Japanese Population-Based Study. *Archives of Environmental & Occupational Health*, 70(6), 341-353. doi:10.1080/19338244.2014.926855
- Azuma, K., Uchiyama, I., Tanigawa, M., Bamba, I., Azuma, M., Takano, H., . . . Sakabe, K. (2015b). Assessment of cerebral blood flow in patients with multiple chemical sensitivity using near-infrared spectroscopy--recovery after olfactory stimulation: a case-control study. *Environmental Health and Preventive Medicine*, 20(3), 185-194. doi:10.1007/s12199-015-0448-4
- Azuma, K., Uchiyama, I., Tanigawa, M., Bamba, I., Azuma, M., Takano, H., . . . Sakabe, K. (2016). Association of Odor Thresholds and Responses in Cerebral Blood Flow of the Prefrontal Area during Olfactory Stimulation in Patients with Multiple Chemical Sensitivity. *PloS One*, 11(12), e0168006. doi:10.1371/journal.pone.0168006
- Azuma, K., Uchiyama, I., & Kunugita, N. (2019). Factors affecting self-reported chemical intolerance: A five-year follow-up study in Japan. *Journal of Psychosomatic Research*, 118, 1-8. doi:10.1016/j.jpsychores.2019.01.001
- Cui, X., Lu, X., Hiura, M., Oda, M., Miyazaki, W., & Katoh, T. (2013). Evaluation of genetic polymorphisms in patients with multiple chemical sensitivity. *PloS One*, 8(8), e73708-e73708. doi:10.1371/journal.pone.0073708
- Cui, X., Lu, X., Hiura, M., Oda, M., Hisada, A., Miyazaki, W., . . . Katoh, T. (2014). Prevalence and interannual changes in multiple chemical sensitivity in Japanese workers. *Environmental Health and Preventive Medicine*, 19(3), 215-219. doi:10.1007/s12199-014-0378-6

- Cui, X., Lu, X., Hisada, A., Fujiwara, Y., & Katoh, T. (2015). The correlation between mental health and multiple chemical sensitivity: a survey study in Japanese workers. *Environmental Health and Preventive Medicine*, 20(2), 123-129. doi:10.1007/s12199-014-0434-2
- Fujimori, S., Hiura, M., Yi, C. X., Xi, L., & Katoh, T. (2012). Factors in genetic susceptibility in a chemical sensitive population using QEESI. *Environmental Health and Preventive Medicine*, 17(5), 357-363. doi:10.1007/s12199-011-0260-8
- Hasegawa, M., Ohtomo, M., Mizuki, M., & Akiyama, K. (2009). [Diagnosis of multiple chemical sensitivity by chemical compounds exposure tests]. *Arerugi*, 58(2), 112-118.
- Hojo, S. (2002). A questionnaire survey of multiple chemical sensitivity in Japan by using QEESI. *Neuro-Ophthalmology Japan*, 19(2), 169-175.
- Hojo, S., Kumano, H., Yoshino, H., Kakuta, K., & Ishikawa, S. (2003). Application of Quick Environment Exposure Sensitivity Inventory (QEESI©) for Japanese population: study of reliability and validity of the questionnaire. *Toxicology and Industrial Health*, 19(2-6), 41-49. doi:10.1191/0748233703th180oa
- Hojo, S., Yoshino, H., Kumano, H., Kakuta, K., Miyata, M., Sakabe, K., . . . Ishikawa, S. (2005). Use of QEESI© questionnaire for a screening study in Japan. *Toxicology and Industrial Health*, 21(3-4), 113-124. doi:10.1191/0748233705th219oa
- Hojo, S., Ishikawa, S., Kumano, H., Miyata, M., & Sakabe, K. (2008). Clinical characteristics of physician-diagnosed patients with multiple chemical sensitivity in Japan. *International Journal of Hygiene and Environmental Health*, 211(5-6), 682-689. doi:10.1016/j.ijheh.2007.09.007
- Hojo, S., Sakabe, K., Ishikawa, S., Miyata, M., & Kumano, H. (2009). Evaluation of subjective symptoms of Japanese patients with multiple chemical sensitivity using QEESI©. *Environmental Health and Preventive Medicine*, 14, 267-275.
- Hojo, S., Mizukoshi, A., Azuma, K., Okumura, J., Ishikawa, S., Miyata, M., . . . Sakabe, K. (2018). Survey on changes in subjective symptoms, onset/trigger factors, allergic diseases, and chemical exposures in the past decade of Japanese patients with multiple chemical sensitivity. *International Journal of Hygiene and Environmental Health*, 221(8), 1085-1096. doi:10.1016/j.ijheh.2018.08.001
- Hojo, S., Mizukoshi, A., Azuma, K., Okumura, J., Mizuki, M., & Miyata, M. (2019). New criteria for multiple chemical sensitivity based on the Quick Environmental Exposure and Sensitivity Inventory developed in response to rapid changes in ongoing chemical exposures among Japanese. *PloS One*, 14(4), e0215144-e0215144. doi:10.1371/journal.pone.0215144
- Ishibashi, M., Tonori, H., Miki, T., Miyajima, E., Kudo, Y., Tsunoda, M., Sakabe, K., & Aizawa, Y. (2007). Classification of patients complaining of sick house syndrome and/or multiple chemical sensitivity. *Tohoku Journal of Experimental Medicine*, 211(3), 223-233. https://doi.org/10.1620/tjem.211.223
- Lu, X., Hisada, A., Anai, A., Nakashita, C., Masuda, S., Fujiwara, Y., . . . Katoh, T. (2020). Study of the Correlation Between Multiple Chemical Sensitivity and Personality Using the Quick Environmental Exposure Sensitivity Inventory Questionnaire and the Temperament and Character Inventory. *Journal of Occupational and Environmental Medicine*, 62(7), e348-e354. doi:10.1097/jom.0000000000001899
- Manabe, R., Kunugita, N., Katoh, T., Kuroda, Y., Akiyama, Y., Yamano, Y., . . . Arashidani, K. (2008). [Questionnaire survey of workers in specific buildings regarding multiple chemical sensitivity]. *Nihon Eiseigaku Zasshi. Japanese Journal of Hygiene*, 63(4), 717-723. doi:10.1265/jjh.63.717
- Mizuki, M. (2004) Effect of environmental factors in patients with multiple chemical sensitivity. *IRYO-Japanese Journal of National Medical Services*, 58(7), 399-407.
- Mizuki, M. (2004) Intractable factors in patients with chemical sensitivity. *IRYO-Japanese Journal of National Medical Services*, 69(3), 117-126.

- Mizukoshi, A., Kumagai, K., Yamamoto, N., Noguchi, M., Yoshiuchi, K., Kumano, H., . . . Yanagisawa, Y. (2015). In-situ Real-Time Monitoring of Volatile Organic Compound Exposure and Heart Rate Variability for Patients with Multiple Chemical Sensitivity. *International Journal of Environmental Research and Public Health*, 12(10), 12446-12465. doi:10.3390/ijerph121012446
- Nakaoka, H., Suzuki, N., Nakayama, Y., Takaya, K., Todaka, E., and Mori, C. (2018). A preliminary study to investigate the relationships between indoor environment and its effect on physical and mental health. *WIT Transactions on Ecology and the Environment*, 230, 567-576.
- Ohsawa, M., Takayama, S., Kikuchi, A., Arita, R., Saito, N., Hojo, S., . . . Yaegashi, N. (2020). Two Cases of Multiple Chemical Sensitivity Successfully Treated With Kampo Medicine. *Alternative Therapies in Health and Medicine*.
- Suzuki, N., Nakaoka, H., Nakayama, Y., Tsumura, K., Takaguchi, K., Takaya, K., . . . Mori, C. (2020). Association between sum of volatile organic compounds and occurrence of building-related symptoms in humans: A study in real full-scale laboratory houses. *Science of the Total Environment*, 750, 141635. doi:10.1016/j.scitotenv.2020.141635
- Watai, K., Fukutomi, Y., Hayashi, H., Kamide, Y., Sekiya, K., & Taniguchi, M. (2018). Epidemiological association between multiple chemical sensitivity and birth by caesarean section: a nationwide case-control study. *Environmental Health*, 17(1), 89. doi:10.1186/s12940-018-0438-2
- Yoshino, H., Amano, K., Matsumoto, M., Netsu, K., Ikeda, K., Nozaki, A., . . . Ishikawa, S. (2004). Long-Term Field Survey of Indoor Air Quality and Health Hazards in Sick House. *Journal of Asian Architecture and Building Engineering*, 3(2), 297-303. doi:10.3130/jaabe.3.297

### **Saudi Arabia**

- Khalil, A. I., Almutairi, M. S., & Ahmed, M. E. (2020). Assessing risk factors of Autism Spectrum Disorders (ASD) and Attention Deficit Hyperactivity Disorder (ADHD) among Saudi Mothers: A retrospective study [Article]. *Clinical Schizophrenia and Related Psychoses*, 14(1), Article 092320. <https://doi.org/10.3371/CSRP.IASM.092320>

### **South Korea**

- Heo, Y., Kim, S. H., Lee, S. K., & Kim, H. A. (2017). Factors Contributing to the Self-Reported Prevalence of Multiple Chemical Sensitivity in Public Facility Workers and the General Population of Korea. *J uoeh*, 39(4), 249-258. doi:10.7888/juoeh.39.249
- Jeon, B. H. L., S.H.; Kim H.A. (2012). A Validation of the Korean Version of QEESI(c) (The Quick Environmental Exposure and Sensitivity Inventory). *Korean Journal of Occupational and Environmental Medicine*, 24(1), 96-114.
- Jeong, I., Kim, I., Park, H. J., Roh, J., Park, J. W., & Lee, J. H. (2014). Allergic diseases and multiple chemical sensitivity in Korean adults. *Allergy, Asthma & Immunology Research*, 6(5), 409-414. doi:10.4168/aair.2014.6.5.409
- Yun, M. J., Kang, D. M., Lee, K. H., Kim, Y. K., & Kim, J. E. (2013). Multiple chemical sensitivity caused by exposure to ignition coal fumes: a case report. *Ann Occup Environ Med*, 25(1), 32. doi:10.1186/2052-4374-25-32

## **Spain**

- Aguilar-Aguilar, E., Marcos-Pasero, H., de la Iglesia, R., Espinosa-Salinas, I., Ramírez de Molina, A., Reglero, G., & Loria-Kohen, V. (2018). Characteristics and determinants of dietary intake and physical activity in a group of patients with multiple chemical sensitivity. *Endocrinol Diabetes Nutr*, 65(10), 564-570. doi:10.1016/j.endinu.2018.07.009
- Alobid, I., Nogué, S., Izquierdo-Dominguez, A., Centellas, S., Bernal-Sprekelsen, M., & Mullol, J. (2014). Multiple chemical sensitivity worsens quality of life and cognitive and sensorial features of sense of smell. *European Archives of Oto-Rhino-Laryngology*, 271(12), 3203-3208. doi:10.1007/s00405-014-3015-5
- Fernandez-Solà, J. (2005). Chronic fatigue syndrome and fibromyalgia in patients affected with multiple chemical sensitivity. *Med Clin (Barc)*; 124: 451-453.
- García-Sierra, R., & Álvarez-Moleiro, M. (2014). Evaluation of suffering in individuals with multiple chemical sensitivity. *Clínica y Salud*, 25(2), 95-103. doi:https://doi.org/10.1016/j.clysa.2014.06.006
- Lago Blanco, E., Puiguriguer Ferrando, J., Rodríguez Enríquez, M., Agüero Gento, L., Salvà Coll, J., & Pizà Portell, M. R. (2016). Multiple chemical sensitivity: Clinical evaluation of the severity and psychopathological profile. *Medicina Clínica*, 146(3), 108-111. https://doi.org/10.1016/j.medcli.2015.09.016
- Mena, G., Sequera, V. G., Nogué-Xarau, S., Ríos, J., Bertran, M. J., & Trilla, A. (2013). [Translation and cross-cultural adaptation of the Quick Environmental Exposure and Sensitivity Inventory for use in the Spanish population]. *Medicina Clínica*, 140(7), 302-304. doi:10.1016/j.medcli.2012.10.024
- Nogué, S., Fernández-Solá, J., Rovira, E., Montori, E., Fernández-Huerta, J. M., & Munné, P. (2007). [Multiple chemical sensitivity: study of 52 cases]. *Medicina Clínica*, 129(3), 96-98; quiz 99. doi:10.1157/13107370
- Paredes Rizo, M. (2018). Multiple Chemical Sensitivity: analysis of a case registered in a reference Hospital. *Medicine and Occupational Safety*, 64 (251), 217-240.
- Pérez-Crespo, J., Lobato-Cañón, R., & Solanes-Puchol, Á. (2018). Multiple Chemical Sensitivity in Chemical Laboratory Workers. *Safety and health at work*, 9(4), 473-478. doi:10.1016/j.shaw.2018.03.001

## **Sweden**

- Andersson, M. J., Andersson, L., Bende, M., Millqvist, E., & Nordin, S. (2009). The idiopathic environmental intolerance symptom inventory: development, evaluation, and application. *Journal of Occupational and Environmental Medicine*, 51(7), 838-847. doi:10.1097/JOM.0b013e3181a7f021
- Nordin, S., & Andersson, L. (2010). Evaluation of a Swedish version of the Quick Environmental Exposure and Sensitivity Inventory. *International Archives of Occupational and Environmental Health*, 83(1), 95-104. doi:10.1007/s00420-009-0427-4

## **United States**

- Gould Peek, G., & Wallace Lyon, M. (2014). Housing and Health Relationship: Multiple Chemical Sensitivity (MCS). *Housing and Society*, 41(1), 31-52. doi:10.1080/08882746.2014.11430620
- Heilbrun, L. P., Palmer, R. F., Jaen, C. R., Svoboda, M. D., Perkins, J., & Miller, C. S. (2015). Maternal Chemical and Drug Intolerances: Potential Risk Factors for Autism and Attention Deficit Hyperactivity Disorder (ADHD). *Journal of the American Board of Family Medicine*, 28(4), 461-470. doi:10.3122/jabfm.2015.04.140192

- Katerndahl, D. A., Bell, I. R., Palmer, R. F., & Miller, C. S. (2012). Chemical intolerance in primary care settings: prevalence, comorbidity, and outcomes. *Annals of Family Medicine*, 10(4), 357-365. doi:10.1370/afm.1346
- Miller, C. S., & Prihoda, T. J. (1999b). The Environmental Exposure and Sensitivity Inventory (EESI): a standardized approach for measuring chemical intolerances for research and clinical applications. *Toxicology and Industrial Health*, 15(3-4), 370-385. doi:10.1177/074823379901500311
- Miller, C. S., & Prihoda, T. J. (1999b). A controlled comparison of symptoms and chemical intolerances reported by Gulf War veterans, implant recipients and persons with multiple chemical sensitivity. *Toxicology and Industrial Health*, 15(3-4), 386-397. doi:10.1177/074823379901500312
- Palmer, R. F., Jaén, C. R., Perales, R. B., Rincon, R., Forster, J. N., & Miller, C. S. (2020). Three questions for identifying chemically intolerant individuals in clinical and epidemiological populations: The Brief Environmental Exposure and Sensitivity Inventory (BREESI). *PloS One*, 15(9), e0238296. doi:10.1371/journal.pone.0238296

### **Uruguay**

- De Ben, S., Sponton, F. Chaves, E., Medina, F., Tomasina, F. (2014.) Multiple chemical sensitivity: a challenge for occupational health. *Rev Med Urug*, 30: 123-127.
